# Supplementary material for: Exploring Barriers to Agroforestry Adoption by Cocoa Farmers in South-Western Côte d’Ivoire
Source: MDPI journal article supplement (doi:10.3390/su132313075), 2021-11-25
Supplement: s1 [file s1]

## SUPPLEMENTARY MATERIAL

**Table S1.** Multicollinearity detection in a multinomial logistic regression model.

Generalized variance Inflation Factor (GVIF) showing multicollinearity (adjusted generalized variance inflation factors (AGVIF) > 2.5) between the independent variables in a logistic regression model with agroforestry adoption as the dependent variable. This was developed using the car package [1] in the R platform 3.6.0 [2].

| Variables                 | GVIF     | df | AGVIF    |
|---------------------------|----------|----|----------|
| Age                       | 2.116828 | 1  | 1.454932 |
| Gender                    | 2.862869 | 1  | 1.692001 |
| Household size            | 1.762694 | 1  | 1.327665 |
| Marital status            | 1.592504 | 3  | 1.080638 |
| Education                 | 1.465888 | 4  | 1.048969 |
| Migration status          | 1.864452 | 2  | 1.168524 |
| Residence time            | 1.952745 | 1  | 1.397406 |
| Number of rooms           | 1.598668 | 1  | 1.264385 |
| Source of energy          | 1.000001 | 3  | 1.000000 |
| Land tenure status        | 1.143212 | 1  | 1.069211 |
| Quality of the respondent | 1.133029 | 5  | 1.012568 |
| Size of cocoa farm        | 1.406035 | 1  | 1.185764 |
| Existence of shade tree   | 1.048468 | 1  | 1.023947 |

$$AGVIF = GVIF^{1/(2*df)}.$$

**Table S1 References**

1. Fox J. Weisberg S (2019) An R Companion to Applied Regression. Third. Sage. Thousand Oaks CA. USA
2. R Core Team (2019) R: A language and environment for statistical computing. R Foundation for Statistical Computing. Vienna. Austria

**Table S2.** Other socioeconomic characteristics of the household.

| Socioeconomic attributes       |                   | NAF   | AF    | Nawa region | $\chi^2$<br>(p-value) |
|--------------------------------|-------------------|-------|-------|-------------|-----------------------|
| Mobile telephone               | No                | 27.08 | 12.41 | 13.19       | 7.3145 (0.007)        |
|                                | Yes               | 72.92 | 87.59 | 86.81       |                       |
| Wall construction materials    | Mud house         | 85.42 | 85.50 | 85.49       | 0.480 (0.923)         |
|                                | Brick house       | 14.58 | 13.57 | 13.63       |                       |
|                                | Wooden house      | 0.00  | 0.58  | 0.55        |                       |
|                                | Other type        | 0.00  | 0.35  | 0.33        |                       |
| Roof construction materials    | Plastic tarpaulin | 12.50 | 16.13 | 15.93       | 0.693 (0.707)         |
|                                | Straw             | 20.83 | 22.85 | 22.75       |                       |
|                                | Corrugated sheet  | 66.67 | 61.02 | 61.32       |                       |
| Principal source of energy (%) | Firewood          | 97.92 | 99.07 | 99.01       | 5.067 (0.167)         |
|                                | Charcoal          | 0.00  | 0.58  | 0.55        |                       |
|                                | Butane gas        | 2.08  | 0.23  | 0.33        |                       |
|                                | Other             | 0.00  | 0.12  | 0.11        |                       |
| Water supplying source         | Well              | 70.83 | 61.37 | 61.87       | 3.419 (0.490)         |
|                                | River and marigot | 4.17  | 6.26  | 6.15        |                       |
|                                | Tapwater          | 16.67 | 14.73 | 14.84       |                       |
|                                | Rainwater         | 0.00  | 0.23  | 0.22        |                       |
|                                | Other             | 8.33  | 17.40 | 16.92       |                       |

|              |                |       |       |       |               |
|--------------|----------------|-------|-------|-------|---------------|
| Light source | Electric power | 58.33 | 43.50 | 44.29 | 9.831 (0.043) |
|              | Solar energy   | 8.33  | 7.31  | 7.36  |               |
|              | Paraffin lamp  | 0.00  | 6.73  | 6.37  |               |
|              | Pocket torch   | 29.17 | 41.18 | 40.55 |               |
|              | Other          | 4.17  | 1.28  | 1.43  |               |

AF: Agroforestry farmers; NAF: non-agroforestry farmers.

**Table S3.** Land tenure status and farmer quality.

| Land tenure attributes                   |                           | NAF   | AF    | Nawa region | $\chi^2$ ( <i>p-value</i> ) |
|------------------------------------------|---------------------------|-------|-------|-------------|-----------------------------|
| Land tenure status                       | Tenant                    | 0.00  | 3.71  | 3.52        | 2.635 (0.268)               |
|                                          | Owner with land title     | 6.25  | 9.74  | 9.56        |                             |
|                                          | Owner with local contract | 93.75 | 86.54 | 86.92       |                             |
| Respondent quality vis-à-vis to the farm | Owner                     | 97.92 | 96.17 | 96.26       | 3.799 (0.579)               |
|                                          | Manager                   | 0.00  | 1.39  | 1.32        |                             |
|                                          | Family labor              | 0.00  | 1.62  | 1.54        |                             |
|                                          | Salaried labor            | 0.00  | 0.12  | 0.11        |                             |
|                                          | Sharecropper              | 2.08  | 0.46  | 0.55        |                             |
|                                          | Other                     | 0.00  | 0.23  | 0.22        |                             |

AF: Agroforestry farmers; NAF: non-agroforestry farmers.
